# Supplementary material for: A flexible Sb2O3/carbon cloth composite as a free-standing high performance anode for sodium ion batteries
Source: Royal Society of Chemistry journal article supplement (doi:10.1039/c7cc06945f), 2017-01-01
Supplement: c7cc06945f1.pdf [file c7cc06945f1.pdf]

## Supporting information

### **Flexible Sb<sub>2</sub>O<sub>3</sub>/carbon cloth composite as a free-standing high performance anode for sodium ion batteries**

Jie Fei, Yali Cui, Jiayin Li, Zhanwei Xu, Jun Yang, Ruiyi Wang, Yayi Cheng,

Jianfeng Huang\*

College of Material Science & Engineering, Shaanxi University of Science and Technology, Shaanxi 710021, P. R. China

E-mail: Huang Jianfeng@sust.edu.cn

#### **1. Experimental Section**

**Preparation of carbon cloth substrate.** Using carbon cloth (CC) supplied by Weihai Guangwei Group Co. Ltd., China as templates, flexible Sb<sub>2</sub>O<sub>3</sub>/CC anodes were fabricated by a simple solvothermal method. Before the fabrication of Sb<sub>2</sub>O<sub>3</sub> samples, the CC was cleaned by sonication sequentially in acetone, deionized water, and ethanol for 30 min each and then anodized in electrodeposition equipment at 5V for 2 minutes. After dried, the CC substrate was obtained.

**Synthesis of Sb<sub>2</sub>O<sub>3</sub>/CC and pure Sb<sub>2</sub>O<sub>3</sub> samples.** Flexible Sb<sub>2</sub>O<sub>3</sub>/CC composite was synthesized via a two-step process. In a typical process, 2.5 mmol of SbCl<sub>3</sub> was first dissolved in 40mL anhydrous ethanol to form homogeneous solution. NaOH solution was added to homogeneous solution until formed a sol solution under vigorous stirring. After dipping CC (5 cm×5 cm) in sol solution and drying for 3 times, keep adding NaOH solution until the pH of solution reached 8-9. The solution and CC was then transferred into a Teflon-lined stainless autoclave. The autoclave was sealed and maintained at 150 °C for 6 h. After the autoclave cooled down to room temperature, the product was collected, washed, vacuum dried. Pure Sb<sub>2</sub>O<sub>3</sub> was also prepared under the same condition without CC.

#### **Electrochemical Measurement of Sodium-ion Batteries.**

CC with Sb<sub>2</sub>O<sub>3</sub> nanospheres covered was first cut into many smaller round pieces with the diameter of 16 mm. Both Sb<sub>2</sub>O<sub>3</sub>/CC and CC electrodes were weighed in a high-precision analytical balance (Sartorius, max weight 5100 mg,  $d=0.001$  mg). The

reading difference was the exact mass for the coated  $\text{Sb}_2\text{O}_3$  on CC. The loading density of the  $\text{Sb}_2\text{O}_3$  active materials is calculated as  $0.1\sim 0.2\text{ mg/cm}^2$ . The electrochemical performance of the  $\text{Sb}_2\text{O}_3$  was investigated by using it as anode in coin-type half-cells, which were laboratory-assembled by a CR2032 press in an argon-filled glove box. A Cu foil was used as the counter electrode and reference electrodes. Flexible  $\text{Sb}_2\text{O}_3/\text{CC}$  composite was used directly as the working electrode without any polymeric binder or carbon black conductive additives. The electrolyte was a mixture of ethylene carbonate and dimethyl carbonate 1:1 (w/w) containing 1 M  $\text{NaClO}_4$  and 5 wt% fluoroethylene carbonate additive. The galvanostic charge/discharge tests were conducted using a New are battery testing system under different current density with a voltage range of 0.01-3.0 V (vs  $\text{Na}/\text{Na}^+$ ). Cyclic voltammetry and electrochemical impedance spectroscopy were conducted using a CHI 600D electrochemistry workstation.

**Characterizations:** X-ray diffraction (XRD) patterns were obtained using a Rigaku (Japan, D/max-2200PC) with Cu  $K\alpha$  radiation ( $\lambda=1.5406\text{ \AA}$ ) in the  $2\theta$  ranging from 15 to 70. X-ray photoelectron spectra (XPS) were conducted using a Surface Science Instruments Spectrometer focused on monochromatic Al  $K\alpha$  radiation (1486.6 eV). The morphology and microstructure of the samples were observed using field emission scanning electron microscope (FESEM, Hitachi, S-4800) and transmission electron microscope (TEM, TecnaiG2F20S-TWIN).

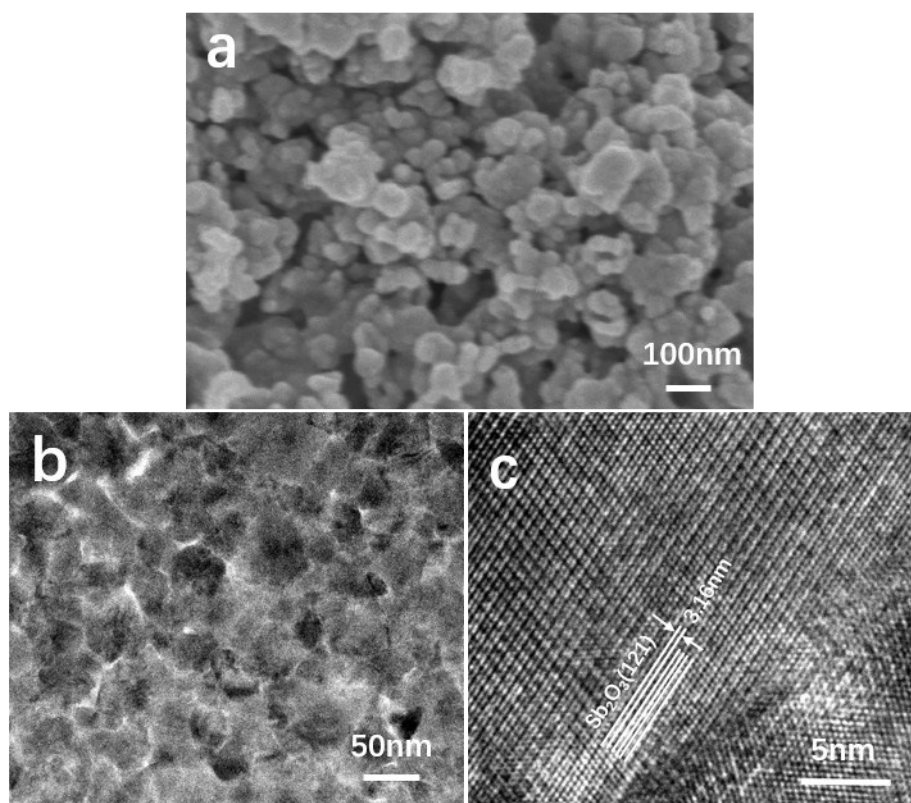

Figure. S1 (a) FESEM, (b) TEM and (c) HRTEM micrographs of pure  $\text{Sb}_2\text{O}_3$ .

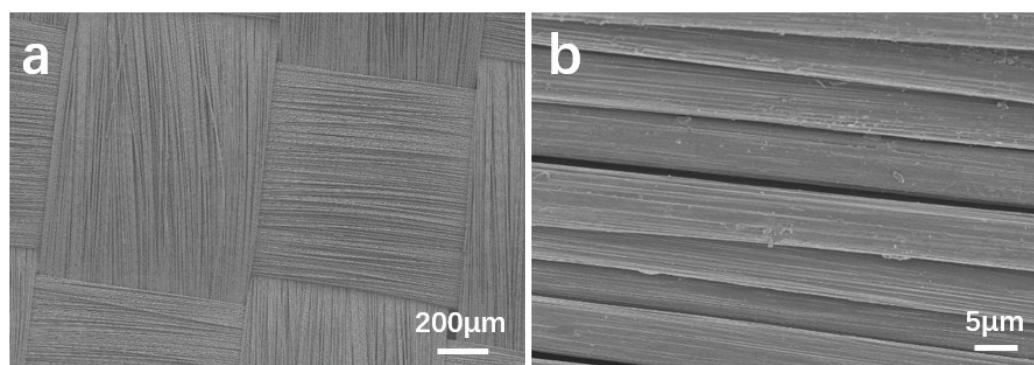

Fig. S2 (a) Low and (b) high resolution SEM micrographs of CC.

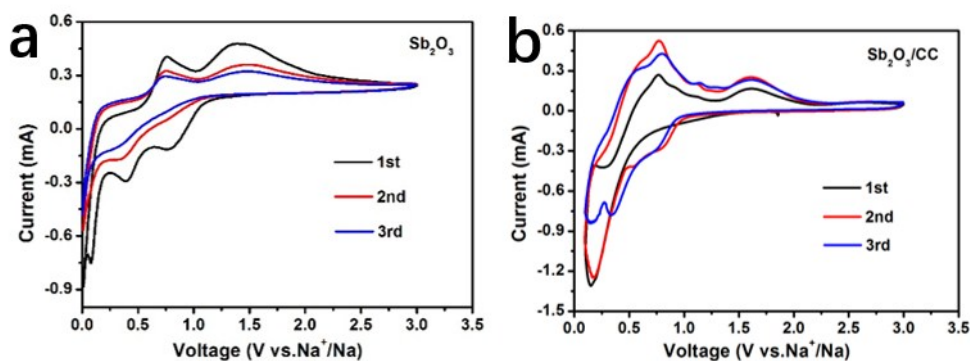

Fig. S3 CV curves of the (a)  $\text{Sb}_2\text{O}_3$  and (b)  $\text{Sb}_2\text{O}_3/\text{CC}$  electrode at first third cycles.

Fig. S3 display the CV curves of pure  $\text{Sb}_2\text{O}_3$  and  $\text{Sb}_2\text{O}_3/\text{CC}$  electrode which were measured at a scan rate of 0.1 mV/s between 0 and 3V (vs  $\text{Na}/\text{Na}^+$ ). For pure  $\text{Sb}_2\text{O}_3$  electrode, it can be observed that the first cathodic scan is different from the following cathodic scans. During the first reduction scan, a reduction peak at 0.75 V in the first cycle assigned to the conversion reaction between  $\text{Sb}_2\text{O}_3$  and  $\text{Na}^+$  (reaction 1) almost disappears in the 2nd and 3rd cycles, suggesting that the first step reveals weak reversibility. Moreover, a cathodic peak at 0.4 V is observed corresponding to the formation of the solid electrolyte interface (SEI) and the alloying reaction between Sb and  $\text{Na}^+$ . In the following cycles, the cathodic peaks gradually stabilize at 0.35 V, demonstrating that the alloying reaction is reversible. During the reverse anodic scans, two oxidative peaks positioned at around 0.75 and 1.35 V are assigned to the dealloying reaction of Na-Sb compounds and the extraction of  $\text{Na}^+$  from  $\text{Na}_2\text{O}$ . As for  $\text{Sb}_2\text{O}_3/\text{CC}$ , the CV curves are similar to those of  $\text{Sb}_2\text{O}_3$ . However, there still exists some differences. During the anodic scans, the reduction peak at 0.75 V assigned to the conversion reaction between  $\text{Sb}_2\text{O}_3$  and  $\text{Na}^+$  (reaction 1) still appears in 3rd cycle and the oxidative peak at 0.75 V assigned to the dealloying reaction of Na-Sb compounds is stronger than  $\text{Sb}_2\text{O}_3$  electrode, suggesting that the  $\text{Sb}_2\text{O}_3/\text{CC}$  electrode shows higher reversibility. These differences should be ascribed to the uniform  $\text{Sb}_2\text{O}_3$  on highly conductive CC and strong chemical bonds between  $\text{Sb}_2\text{O}_3$  and CC. In addition, there appears a flat peak at 2.5-3.0V, for the reason that the incorporation of

CC into  $\text{Sb}_2\text{O}_3$  leads to lower polarization and then causes the conversion reaction of  $\text{Sb}_2\text{O}_3$  to  $\text{Sb}_2\text{O}_5$ , which is in good agreement with the following XPS results

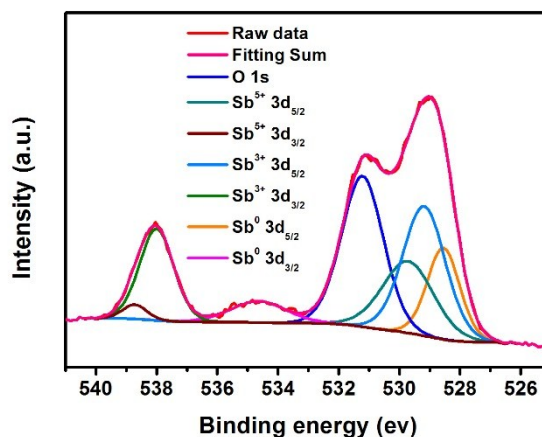

Fig. S4 XPS spectra of the  $\text{Sb}_2\text{O}_3/\text{CC}$  composite at 2.7V charged state at a current density of  $0.05 \text{ A g}^{-1}$  after 100 cycles: Sb3d and O1s.

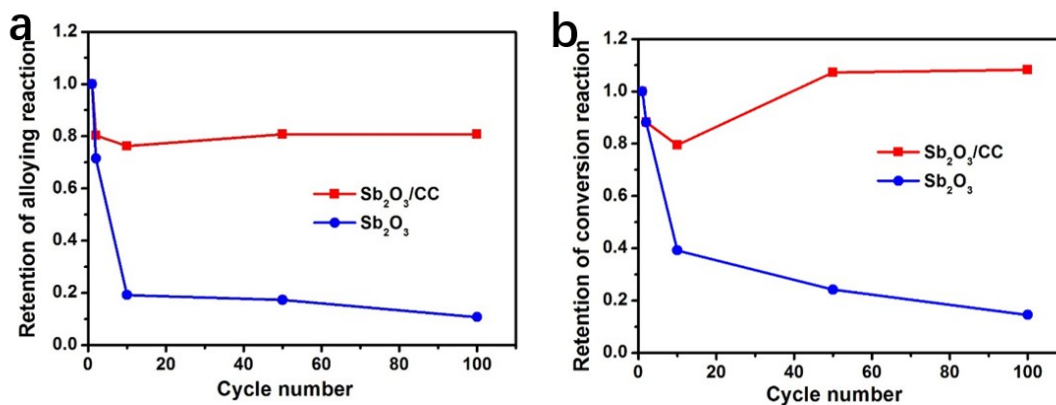

Fig. S5 (a, b) The charge capacity retention of the alloying and conversion reaction at the 1st, 2nd, 10th , 50th and 100th cycles.

Table 1 Cycling performance comparison of the as-prepared  
Sb<sub>2</sub>O<sub>3</sub>/CC composite with previously reported Sb-based anodes

| Materials                                                     | Current density /A g <sup>-1</sup> | First cycle capacity /mA h g <sup>-1</sup> | Cycles | Final cycle capacity /mA h g <sup>-1</sup> |
|---------------------------------------------------------------|------------------------------------|--------------------------------------------|--------|--------------------------------------------|
| Sb/C <sup>10</sup>                                            | 0.05                               | 554                                        | 200    | 315(0.5A g <sup>-1</sup> )                 |
| Sb/C <sup>11</sup>                                            | 0.1                                | 948                                        | 240    | 407                                        |
| ZnSb <sup>12</sup>                                            | 0.02                               | 438(second)                                | 100    | 377                                        |
| Sb <sub>2</sub> S <sub>3</sub> /graphene <sup>13</sup>        | 0.05                               | 710                                        | 100    | 589.3                                      |
| Sb <sub>2</sub> S <sub>3</sub> /SGS <sup>14</sup>             | 0.05                               | 786.2                                      | 900    | 524(2A g <sup>-1</sup> )                   |
| Sb <sub>2</sub> O <sub>4</sub> <sup>15</sup>                  | 0.1                                | 1083.8                                     | 50     | 700                                        |
| Sb <sub>2</sub> O <sub>4</sub> /RGO <sup>16</sup>             | 0.1                                | 944                                        | 100    | 890                                        |
| Sb <sub>2</sub> O <sub>3</sub> film <sup>17</sup>             | 0.5                                | 645                                        | 200    | 414                                        |
| Sb <sub>2</sub> O <sub>3</sub> /RGO <sup>18</sup>             | 0.1                                | 854.6                                      | 50     | 503                                        |
| Sb <sub>8</sub> O <sub>11</sub> Cl <sub>2</sub> <sup>19</sup> | 0.05                               | 774.3                                      | 40     | 362.9                                      |
| Sb <sub>2</sub> O <sub>3</sub> /CC(this work)                 | 0.05                               | 1248                                       | 100    | 900                                        |

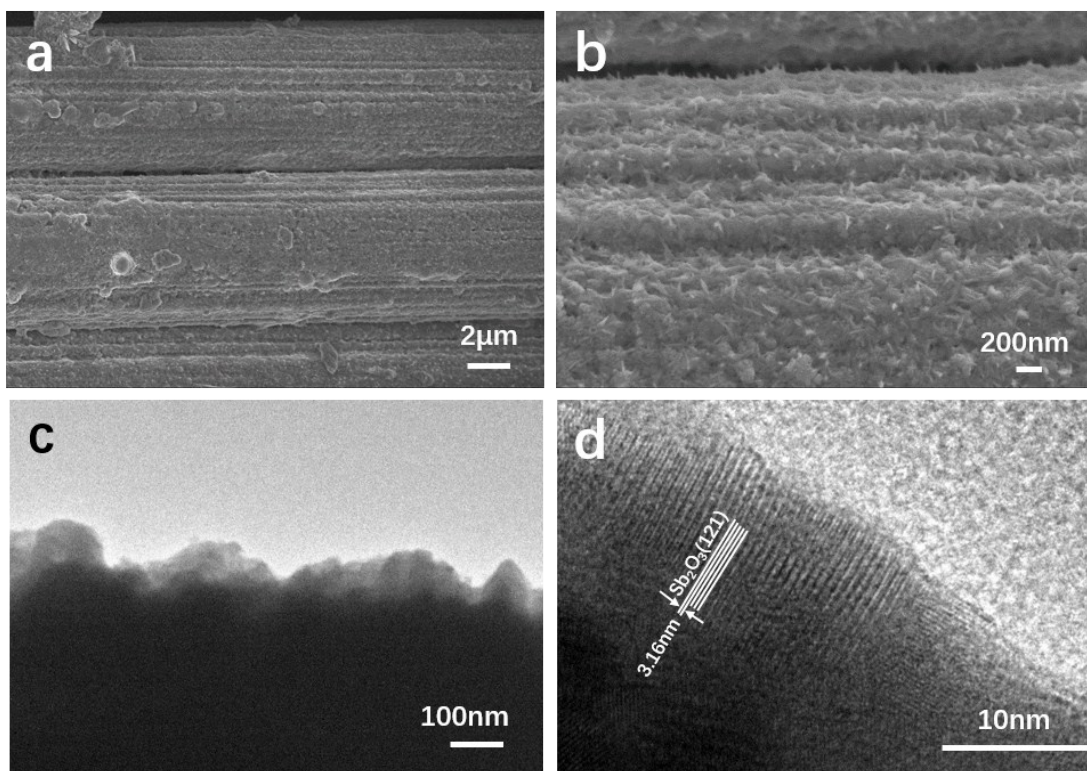

Figure. S6 (a, b) SEM, TEM (b) and HRTEM (c) micrographs of  $\text{Sb}_2\text{O}_3/\text{CC}$  composite after 100 cycles.

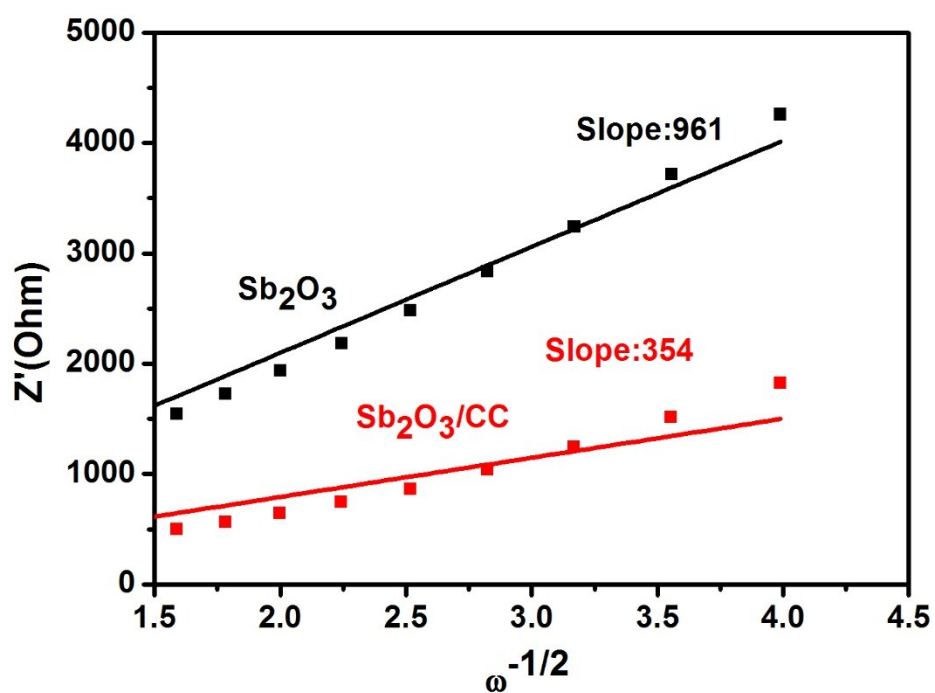

Figure. S7 Dependence of  $Z_{re}$  on the reciprocal square root of the frequency in the low-frequency region of the  $\text{Sb}_2\text{O}_3/\text{CC}$  composite.

The symbols:  $R_e$ ,  $R_f$ ,  $R_{ct}$ ,  $ZW$  and  $CPE$  stand for the resistance of the electrolyte, resistance of SEI layer, charge transfer resistance, Warburg impedance and constant phase element, respectively. Further, the straight line in the low frequency region is the Warburg behaviour which was attributed to the diffusion of  $Na^+$  in the electrode. We can evaluate the apparent  $Na^+$  diffusion coefficient ( $D$ ) of the  $Sb_2O_3$  and  $Sb_2O_3/CC$  electrode by the following equation 4 and 5:

$$D = (R^2 T^2) / (2 A^2 n^4 F^4 C^2 \sigma^2) \quad (4)$$

$$Z_{re} = R_e + R_{ct} + \sigma \omega^{-1/2} \quad (5)$$

The linear fitting according to equation 5 for the low frequency region of the EIS plots shows in Figure S7.
